# Supplementary material for: Italian Children’s Accounts of the Lockdown: Insights and Perspectives
Source: Springer Nature journal article supplement (doi:10.1007/s10826-022-02508-6), 2023-01-01
Supplement: MOESM3 [file 23910064]

## Codebook

*Codes for the student answers to the question “What did you miss most during the lockdown?”.*

| Code                                                                        | Description                                                                                 | Inclusion and exclusion criteria                                                                                                                                        | Examples                                                                                                                                                   |
|-----------------------------------------------------------------------------|---------------------------------------------------------------------------------------------|-------------------------------------------------------------------------------------------------------------------------------------------------------------------------|------------------------------------------------------------------------------------------------------------------------------------------------------------|
| Friendship - Peers                                                          | Explicit references to schoolmates, friends, peers or to the concept of friendship.         | Inclusions (I.) people names, schoolmates, friends, references to the class as a social context.<br>Exclusions (E.)<br>Siblings, pet names, physical contact with peers | <i>meeting with my friends.<br/>my friend Sofia.<br/>my classroom friends.</i>                                                                             |
| School                                                                      | References to school activities or school personnel                                         | I. school, classroom and teachers references; doing a school activity,<br>E. schoolmates.                                                                               | <i>My teachers and my class.<br/>Going to school.<br/>Math and Italian.</i>                                                                                |
| Freedom, autonomy                                                           | Direct or indirect indications connected to freedom or autonomy.                            | I. Outdoor and autonomous activities that were done without adult supervision.<br><br>E.: hobby, sport.                                                                 | <i>Going out.<br/>Go to play in the park<br/>Freedom<br/>Could not go out.</i>                                                                             |
| Family, relatives                                                           | Explicit references to relationships with members of the extended family                    | I. relatives such as Mothers and fathers, grandparents, uncles, cousins etc.                                                                                            | <i>Visit my grandma.<br/>my cousins.<br/>freetime with my dad.</i>                                                                                         |
| Sports – Hobbies - Physical activity                                        | References to all formal sports and other informal leisure physical and outdoor activities. | I. sports, riding the bike, outdoor activities.<br>E. generic hanging out references.                                                                                   | <i>I missed volleyball.<br/>going out for a walk.<br/>going to Salsa practice soccer.<br/>going to the swimming pool<br/>Wandering around with my bike</i> |
| Hugs/hugging - physical contact-<br><br>Gathering/ hanging out with friends | References to contexts that favor meeting other people or allow physical contact.           | I. meeting, hugging, touching, kissing, etc.<br>E. generic references to friends / friendships.                                                                         | <i>touching my friends<br/>hugging my grandparents<br/>walking holding hands with my best friend.<br/>kissing hello.</i>                                   |

|                                              |                                                                               |                                                                          |                                                                     |
|----------------------------------------------|-------------------------------------------------------------------------------|--------------------------------------------------------------------------|---------------------------------------------------------------------|
| Play                                         | Explicit references to the lack of recreational activities in all their forms | I. group games, outdoor games, the concept of having fun, etc.           | Play with my friends.<br>Play outside.<br>Have fun<br>Play together |
| Other (including Pets and positive feelings) | Other                                                                         |                                                                          |                                                                     |
|                                              | Positive feelings                                                             | I. references to positive feelings or positive interpersonal atmosphere. | happiness<br>our harmony<br>smiles on my friends faces              |
|                                              | Pets                                                                          | I. All species of pets or mentioning pet names.<br>E.                    | My grandma dog<br>My horse<br>Alice's cat                           |

*Codes for the student answers to the question “What helped you most during the lockdown?”*

| Code                                                         | Description                                                                                                                                  | Inclusion and exclusion criteria                                                                                                                                                                                                                      | Examples                                                                         |
|--------------------------------------------------------------|----------------------------------------------------------------------------------------------------------------------------------------------|-------------------------------------------------------------------------------------------------------------------------------------------------------------------------------------------------------------------------------------------------------|----------------------------------------------------------------------------------|
| (Support from)<br>Family members and other relatives         | References all figures within the family context who supported the children during the early stages of the Covid emergency.                  | Inclusions (I.): the presence of or activities carried out with members of their family unit<br>Exclusions (E.) Proper personal names.                                                                                                                | My parents and my sister<br>Being with my parents<br>Grandparents<br>Mom and dad |
| Videogame, TV (passive)                                      | Explicit references to the passive use of technology to play or watch videos as entertainment                                                | I. Videogames, gaming platforms, apps and services that involve watching videos<br>E. Includes: video games, gaming platforms, service names or applications that involve watching videos<br>Excludes: Using devices to have meaningful relationships | Netflix<br>My Playstation<br>Nintendo Switch<br>Watch so much TV                 |
| Distance learning                                            | Explicit references regarding (operators) in the school context, to all activities and subjects carried out during distance learning.        | I.: teachers, assistants, school subjects, school activities, diverse ways of connecting online?<br>E.                                                                                                                                                | Video Lessons<br>Distance lessons<br>Homework<br>The teacher                     |
| Active use of information and communication technology (ICT) | References to the active use of technology to keep in touch with other people, to carry out research or to produce videos for entertainment. | I. video editing activities, making calls or sharing information through virtual meeting platforms, using search engines to get information<br>E. video lessons, videogames or watching television                                                    | Video calls with friends<br>Phone<br>Computer<br>Internet                        |
| Play                                                         | Explicit references to recreational or play activities carried out in all their forms to pass time or build relationships                    | I. Recreational or play activities carried out alone, with other people or animals, whether they are outdoors or indoors.<br>E. games conducted via digital platforms or when the child uses the word game to indicate a sport.                       | Play with my younger brother<br>Lego<br>Played with toys<br>Play with dolls      |

|                                         |                                                                                                                                                                                                     |                                                                                                                                                                                                    |                                                                                                |
|-----------------------------------------|-----------------------------------------------------------------------------------------------------------------------------------------------------------------------------------------------------|----------------------------------------------------------------------------------------------------------------------------------------------------------------------------------------------------|------------------------------------------------------------------------------------------------|
| Pets                                    | References to animals that have helped children to "tolerate" everyday life during the Covid emergency.                                                                                             | I. animal names, playtime with animals, pets, animals belonging to relatives or friends.                                                                                                           | Cats<br>Playing with my pets<br>My dog "Gea"<br>Grandma's dog                                  |
| Friendship                              | Explicit references to classmates or peers with whom a friendship has been established.                                                                                                             | I.: friends, personal names, relationships also through digital channels, etc.<br>E.                                                                                                               | My friends<br>Talking with friends<br>Friends seen virtually<br>Classmates-peers               |
| Sports – Hobbies -<br>Physical activity | Explicit references to all activities carried out individually or in groups, outdoors or indoors, which produce a psycho-physical well-being in which commitment and passion are invested/involved. | I., playing sports, swimming pool, walking, gym, bike, playing soccer, drawing, ballet, etc.<br>E.                                                                                                 | Playing soccer in the garden<br>riding bikes<br>Going for a walk<br>Drawing                    |
| Feeling useful around the house         | References all those situations in which the child felt useful in carrying out household activities alone or with a family member                                                                   | I. household activities done alone or with a parent<br>E.                                                                                                                                          | Helping mom around the house<br>Make lunch<br>Prepare desserts<br>Helping my dad with the lawn |
| Places and resources within the house   | Explicit references to all areas of the house used as a mean to cope with the Covid emergency                                                                                                       | I. rooms in the house, garden outside the house, your own swimming pool, furniture such as a bed or sofa<br>E. swimming pools intended as places of leisure or sports outside the home environment | The Sofa<br>I went to the balcony<br>The home pool<br>Garden                                   |
| Reading,                                | Explicit references to spending time engaged in reading books for fun                                                                                                                               | I. reading books, reading comics, etc.<br>E. reading school books                                                                                                                                  | Read a book<br>Reading helped me<br>Manga<br>The books                                         |
| music                                   | Explicit references to individual pleasure in listening to music or playing a musical instrument                                                                                                    | I. listening to music, practicing with an instrument.                                                                                                                                              | Listening to music<br>The flute<br>The song that Lisa dedicated to me<br>Music                 |

|                                   |                                                                                                                   |                                                                                                                                                                              |                                                                |
|-----------------------------------|-------------------------------------------------------------------------------------------------------------------|------------------------------------------------------------------------------------------------------------------------------------------------------------------------------|----------------------------------------------------------------|
| Inner strength and self resources | Explicit references to the individual's internal psychological resources that help him cope with life situations. | I. being confident, have courage, patience, etc.<br>E.                                                                                                                       | Hope that things improve<br>Be brave<br>patience               |
| Other                             | Indicates all those words and phrases that were difficult to interpret or that did not fit into a specific Code   | I.: non-decipherable terms, random words, responses inconsistent with the request, or words that indicate emotional states.<br>E. all terms that fell within a specific Code | None<br>Scared<br>The presents they made for me<br>Being alone |

*Codes for the student answer to the vignette “Write on the balloon the things you will do together in school in the next days”, by school level and gender (Table 5)*

|  | Code                                | Description                                                                                                                                                    | Inclusion and exclusion criteria                                                                                                                    | Examples                                                                                                                                    |
|--|-------------------------------------|----------------------------------------------------------------------------------------------------------------------------------------------------------------|-----------------------------------------------------------------------------------------------------------------------------------------------------|---------------------------------------------------------------------------------------------------------------------------------------------|
|  | School subjects                     | References to all those activities and disciplines carried out and learned by children within the school context                                               | Inclusions (I.) peer-to-peer activities, teaching subjects, school trips, learning activities.                                                      | Do homework together<br>Studying new things<br>Do gymnastics class<br>Math                                                                  |
|  | Relationships, sharing with friends | References to those actions that promote relationships with classmates or teachers                                                                             | I. every time the word "together" was written it was considered a relationship, collective activity                                                 | Meet new people<br>Talk together<br>Have fun all together<br>Talk about our personal thoughts                                               |
|  | Play, joking, laughing              | Explicit references to playful-recreational activities carried out in all their forms to pass the time or promote relationship building in the school context. | I. fun activities, jokes, games of various kinds.                                                                                                   | Laugh<br>To play<br>Joke<br>To play hide and seek                                                                                           |
|  | Recess time                         | References to all those moments carried out within the school walls, but which go beyond teaching                                                              | I. recess time, going outdoors,                                                                                                                     | Recess time<br>We went outside<br>Eat together<br>We celebrate birthdays                                                                    |
|  | Covid safety rules                  | References to all those actions used to safeguard and protect one's own health and of others within the school context                                         | I. activities carried out to talk about Covid                                                                                                       | We just have to keep our distance<br>Disinfect your hands<br>We will remind each other of the rules<br>Play one meter apart from each other |
|  | Other                               | Indicates all words and phrases that were difficult to interpret or that did not fit into a specific Code                                                      | I. terms that cannot be deciphered, random words, answers that are not consistent with the request<br>E. all terms that fell within a specific Code | Watch the hummingbird<br>butterflies flying<br>We will be four<br>To smile<br>I don't know                                                  |

|  |                   |                                                                                         |                                                          |                                                              |
|--|-------------------|-----------------------------------------------------------------------------------------|----------------------------------------------------------|--------------------------------------------------------------|
|  | Negative feelings | References to all words used by children to describe back to school in a negative sense | I. boredom, anger manifestations<br>E. positive feelings | We will get angry<br>Get bored<br>Argue<br>We will get bored |
|--|-------------------|-----------------------------------------------------------------------------------------|----------------------------------------------------------|--------------------------------------------------------------|

Codes for the Student answer to the vignette “*John and Mary have heard of Coronavirus from their parents and on television and have different thoughts. What are they thinking?*”.

|  | Code                                      | Description                                                                                                                        | Inclusion and exclusion criteria                                                                                                  | Examples                                                                                                                                  |
|--|-------------------------------------------|------------------------------------------------------------------------------------------------------------------------------------|-----------------------------------------------------------------------------------------------------------------------------------|-------------------------------------------------------------------------------------------------------------------------------------------|
|  | Covid: safety rules                       | Explicit references to protective behaviors normally indicated to prevent Covid infections                                         | Inclusions (I.): social distancing, hygiene rules, masks, etc.<br>Exclusions (E.) vaccine, medical therapies, etc.                | you have to wear a mask!<br>We can't hug each other!                                                                                      |
|  | Covid: cure and future of the pandemic    | References to future or upcoming cures and therapies to defeat Covid infections                                                    | I. vaccine, remedies, medical treatment, etc.<br>E. symptoms, disease, pain                                                       | When will they find the vaccine?<br>Is there a cure?<br>Will they find a remedy?<br>Doctors must make a move to find the covid-19 vaccine |
|  | Covid: curiosities and concerns           | Description and questions related to the nature of the virus and the danger of covid.<br>The main subject is the virus / pandemic. | I. nature, general curiosities, evolution of the virus<br>E. care, general requests for meaning                                   | What is it?<br>How did it develop?<br>It's too contagious<br>Why is it called covid-19?                                                   |
|  | Hope, reassurance<br>Finding the positive | Questions related to the future, desire for normality and return to the life before the covid                                      | I. , questions about what will happen next or in the future<br>E. missing out, worries of not returning to normality, intolerance | What will happen next?<br>Will I go back to school to study and play with my friends<br>When will we be able to leave the house?          |
|  |                                           | Confident state of mind, hopeful expectations and wishes that the situation can improve                                            | I.: optimism, wishful thinking<br>E. disbelief, worry no return to normal.                                                        | But I'm sure we'll make it!<br>It will all be fine<br>I hope it ends soon and that we can live normally                                   |
|  |                                           | Indicates statements relating to the positive aspects of the present situation                                                     | I. positive reframing of the present<br>E. hope, future positive expectations                                                     | Let's have fun!<br>At least I can play video games<br>At least I can sleep more<br>Lucky for netflix                                      |



|  |                                                             |                                                                                                                                                           |                                                                                                                                                             |                                                                                                                                                                                       |
|--|-------------------------------------------------------------|-----------------------------------------------------------------------------------------------------------------------------------------------------------|-------------------------------------------------------------------------------------------------------------------------------------------------------------|---------------------------------------------------------------------------------------------------------------------------------------------------------------------------------------|
|  | Death, disease, pain of people outside the immediate family | Worry about death, pain or illness in reference to others                                                                                                 | I. Other people getting injured, sick or dying.<br>E. loss, fear, worry, self and family death                                                              | How many people have died from the coronavirus?<br>How many were hospitalized instead?<br>There are some who heal others who die<br>People are sick                                   |
|  | Death, disease, pain of family members                      | Worry about death, pain or illness in relation to family members                                                                                          | I. Family members getting sick, injured, in pain, or dying.<br>E. fear, loss, worry                                                                         | What if the coronavirus infects our family?<br>But I wonder if it could affect my family and it could take away my parents<br>What if anyone in our family dies from the coronavirus? |
|  | Death, disease, pain of self                                | Worry about death pain or illness related to oneself                                                                                                      | I. injuries and pains of the self, getting sick or dying.<br>E. general fear, worry, loss                                                                   | I don't want to die<br>What if I have the virus?<br>I don't want to get sick with coronavirus!                                                                                        |
|  | Seeking sense and meaning                                   | Wondering why and what is happening in order to understand the meaning of current events.                                                                 | I. general questions<br>E. protective measures, questions about the nature of the virus                                                                     | Why is everyone talking about this?<br>What is happening?<br>Why do we have to stay at home?                                                                                          |
|  | Bans/loss/absence                                           | References to the restriction to not carry out certain activities based on what is established by an authority, claims relating to loss and shortcomings. | I. limitations of personal life, a sense of emptiness, loss of everyday life, lack, nostalgia<br>E. nature, no return to normality, reference to the future | Because this coronavirus we had to stay at home<br>I can't go to the park<br>I miss my friends                                                                                        |
|  | General fears                                               | Indicates the emotional state of apprehension in relation to a presumed or real danger                                                                    | I. worry, fear, anxiety<br>E. concern for the future, for covid, illness and pain                                                                           | I am really worried<br>I am very worried! It makes me so afraid and worried because it could affect me too<br>anxiety                                                                 |

|  |                                               |                                                                                             |                                                                                                                 |                                                                                                                                                            |
|--|-----------------------------------------------|---------------------------------------------------------------------------------------------|-----------------------------------------------------------------------------------------------------------------|------------------------------------------------------------------------------------------------------------------------------------------------------------|
|  | Anger / frustration                           | Feeling of inner discomfort connected to the current condition of discomfort                | I. boredom, annoyance, intolerance<br>E. aggression, disbelief, fear.                                           | I won't be able to see anyone anymore, I think I'll go crazy<br>I will be very bored<br>Always go out with a mask<br>It seems like a nightmare coming true |
|  | Distance learning (how will it work)          | Doubts and perplexities concerning the school and the telematic modality                    | I. school area<br>E. request for meaning, questions relating to the nature of the covid                         | How do I do with the school?<br>What does remote school mean?<br>Will the benches be far apart?                                                            |
|  | Worry about things not returning to normality | Questions about the future with the doubt that certain things will never return to "normal" | I. sentences with adverbs never and forever, reference to the future,<br>E. shortcomings, loss of everyday life | Will we ever return to indoor sports?<br>Will the covid be there forever?<br>Should we stay home all our life?                                             |
|  | Other/non specified                           | Statements that did not fit a specific code                                                 |                                                                                                                 | Good morning from Mondello, today we are at the beach, there is no "covididi"<br>Never seen ads before<br>Or about a new football team                     |
